# Supplementary material for: Proton-conducting layered structures based on transition metal oxo-clusters supported by Sb(iii) tartrate scaffolds
Source: Royal Society of Chemistry journal article supplement (doi:10.1039/c9dt04333k), 2019-11-26
Supplement: c9dt04333k1.pdf [file c9dt04333k1.pdf]

# Supporting information

## Proton-conducting layered structures based on transition metal oxo-clusters supported by Sb(III)tartrate scaffolds

Wen Ma,<sup>a,b</sup> Bing Hu,<sup>a,\*</sup> Kaiqiang Jing,<sup>a,b</sup> Zhong Li,<sup>c</sup> Jiance Jin,<sup>a,b</sup> Shoutian Zheng<sup>c</sup> and Xiaoying Huang<sup>a,\*</sup>

<sup>a</sup> State Key Laboratory of Structure Chemistry, Fujian Institute of Research on the Structure of Matter, Chinese Academy of Sciences, Fuzhou 350002, China.

<sup>b</sup> University of Chinese Academy of Sciences, Beijing, 100049, China.

<sup>c</sup> State Key Laboratory of Photocatalysis on Energy and Environment, College of Chemistry, Fuzhou University, Fuzhou, 350108, China

† E-mail: [xyhuang@fjirsm.ac.cn](mailto:xyhuang@fjirsm.ac.cn); [hubing@fjirsm.ac.cn](mailto:hubing@fjirsm.ac.cn)

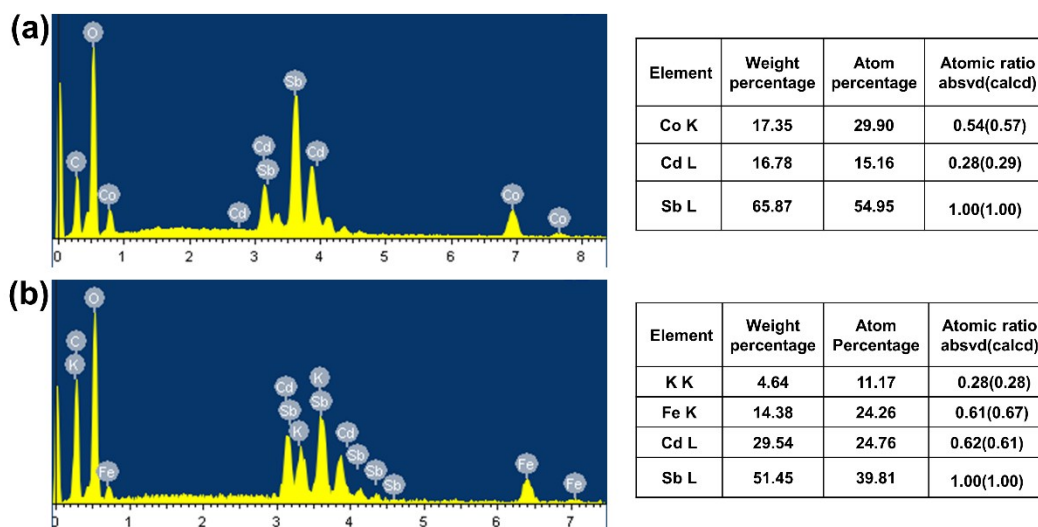

**Fig. S1** Energy dispersive spectroscopy (EDS) results of compounds **1** (a) and **2** (b).

**Table S1.** Inductively Coupled Plasma (ICP)-atomic emission spectrometry (AES) data (%) of compounds **1** and **2**.

|                   |                           |       |       |      |      |
|-------------------|---------------------------|-------|-------|------|------|
| Compound <b>1</b> | ICP(%)                    | Sb    | Cd    | Co   |      |
|                   | Weight percentage(calcd.) | 32.65 | 8.61  | 9.03 |      |
|                   | Weight percentage         | 31.92 | 6.99  | 9.14 |      |
| Compound <b>2</b> | ICP(%)                    | Sb    | Cd    | Fe   | K    |
|                   | Weight percentage(calcd.) | 27.17 | 15.33 | 8.31 | 2.42 |
|                   | Weight percentage         | 25.20 | 14.85 | 8.57 | 2.22 |

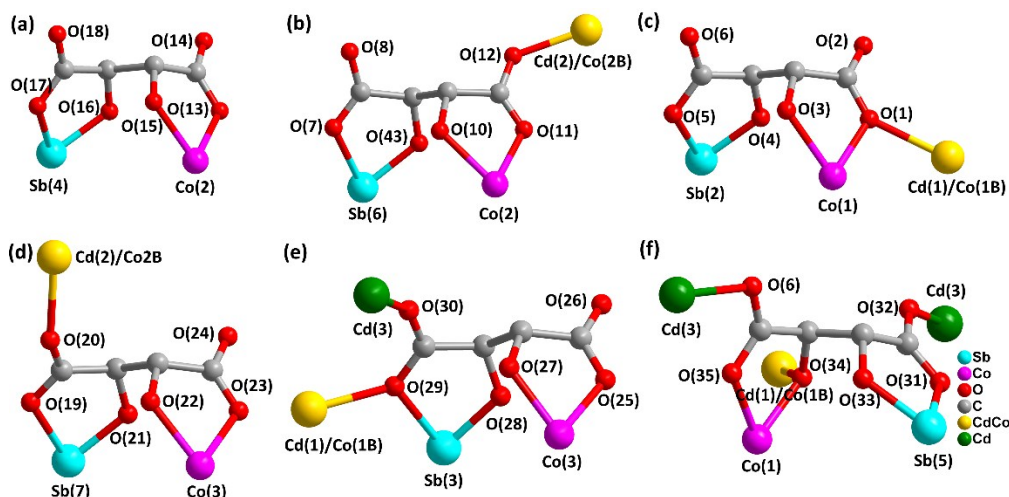

**Fig. S2** Schematic views of the coordination modes of the tartrate ligands in **1**. (a) mode A, (b) mode B, (c) mode C, (d) mode D, (e) mode E and (f) mode F.

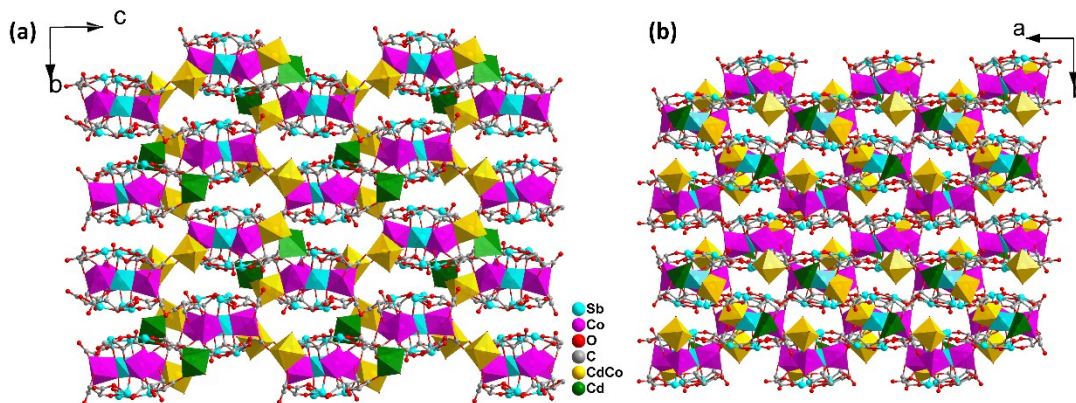

**Fig. S3** Packing diagrams viewed along the *a*-axis (a) and *c*-axis (b), respectively.

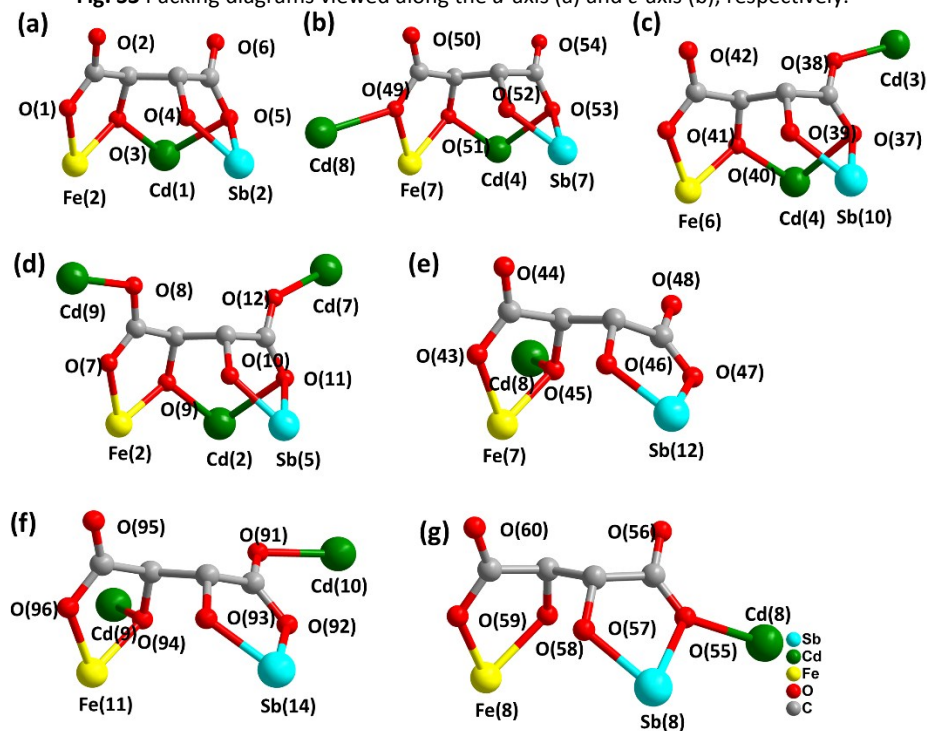

**Fig. S4** Schematic views of the coordination modes of the tartrate ligands in **2**. (a) mode A, (b) mode B, (c) mode C, (d) mode D, (e) mode E, (f) mode F and (g) mode G.

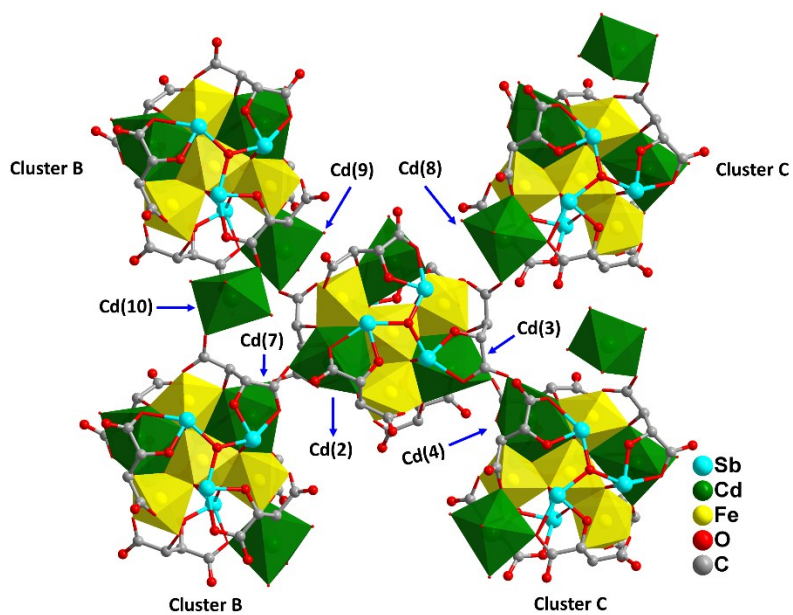

Fig. S5 The connectivity of cluster A in 2.

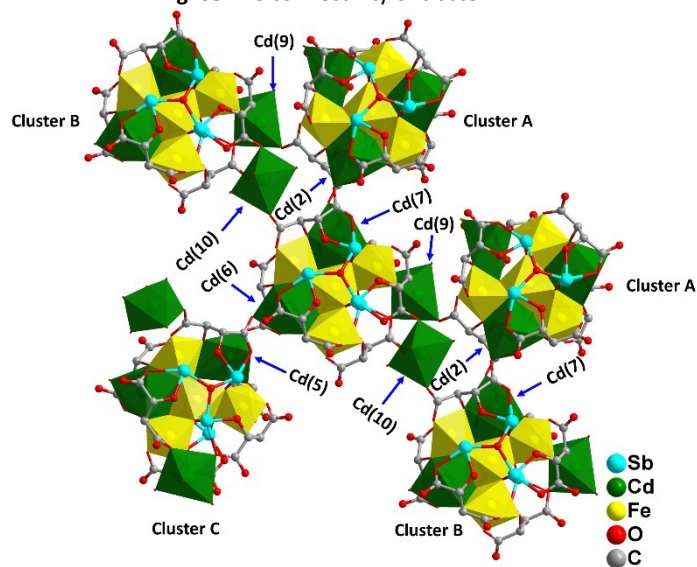

Fig. S6 The connectivity of cluster B in 2.

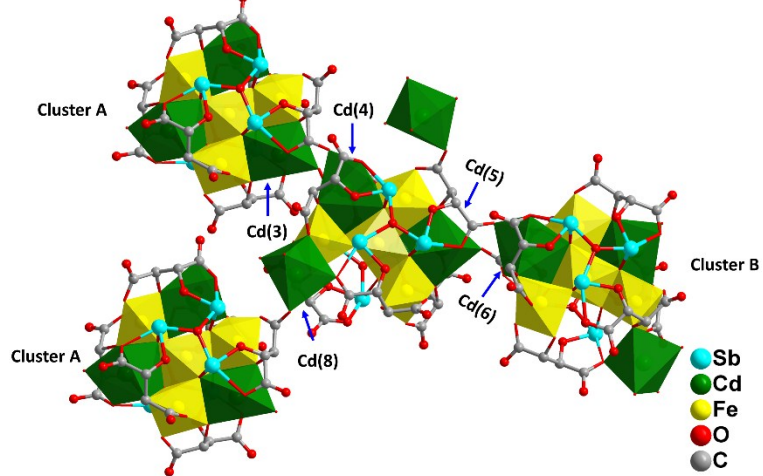

Fig. S7 The connectivity of cluster C in 2.

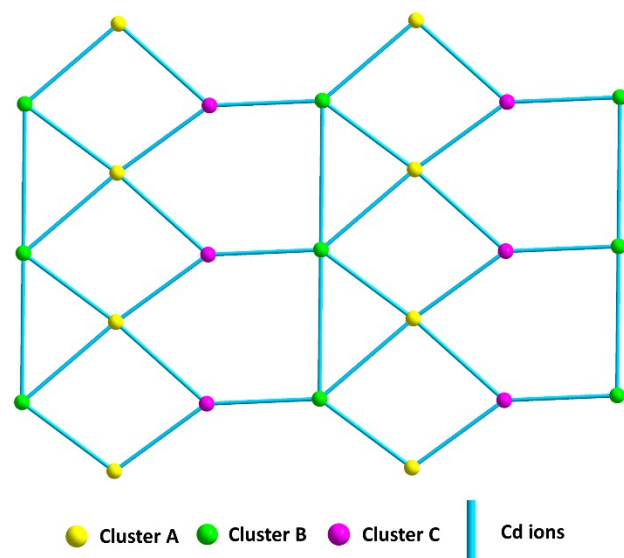

Fig. S8 Topological view of one 2D layer in **2**.

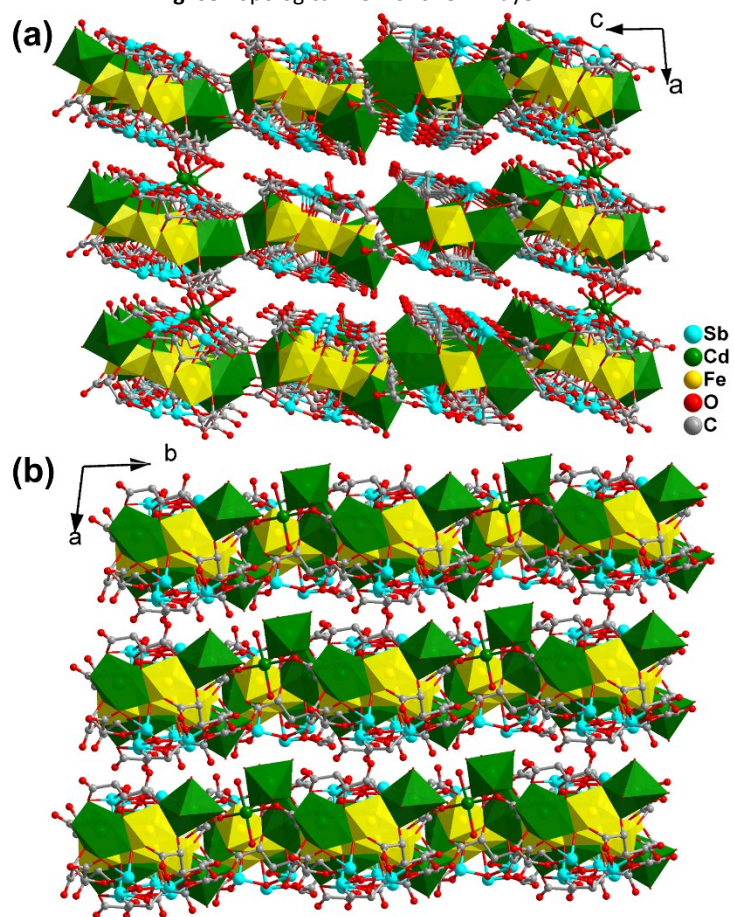

Fig. S9 Packing diagram of **2** viewed along the *b*- and *c*-axis, respectively. The disordered Cd(1B) and Cd(1C) are omitted for clarity.

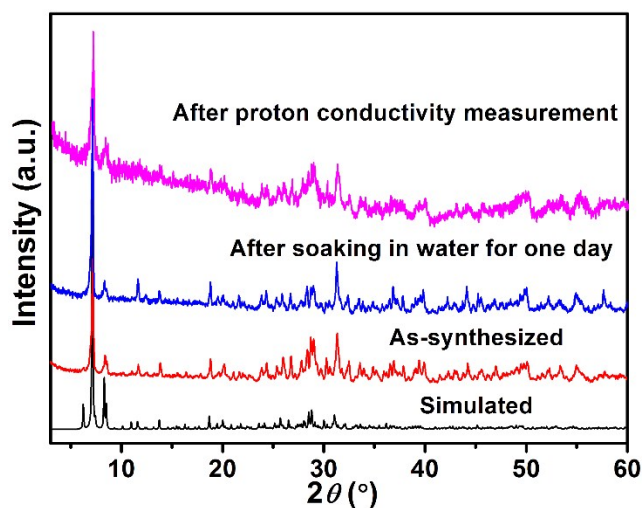

Fig. S10 Simulated and observed powder X-ray diffraction (PXRD) patterns of 1.

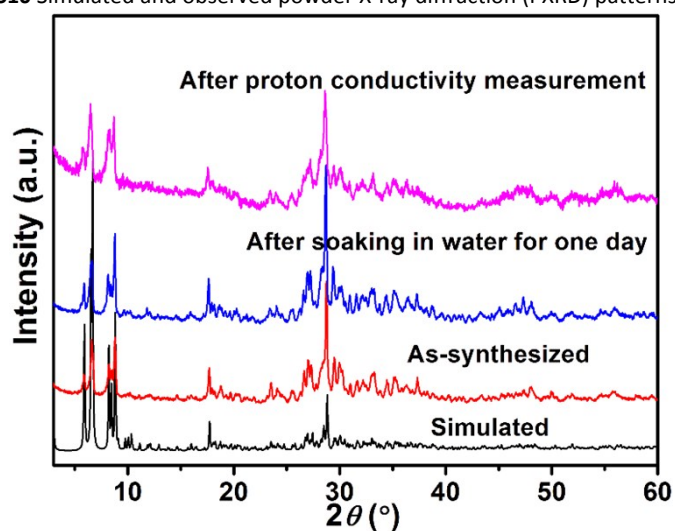

Fig. S11 Simulated and observed PXRD patterns of 2.

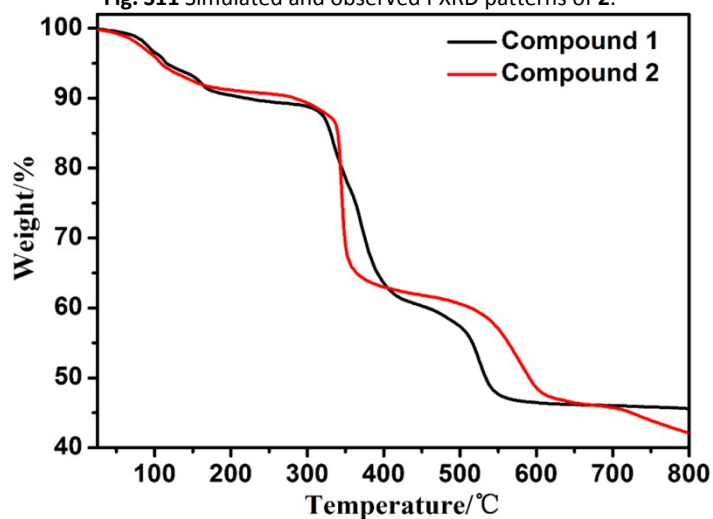

Fig. S12 Thermogravimetric curves for compounds 1 and 2.

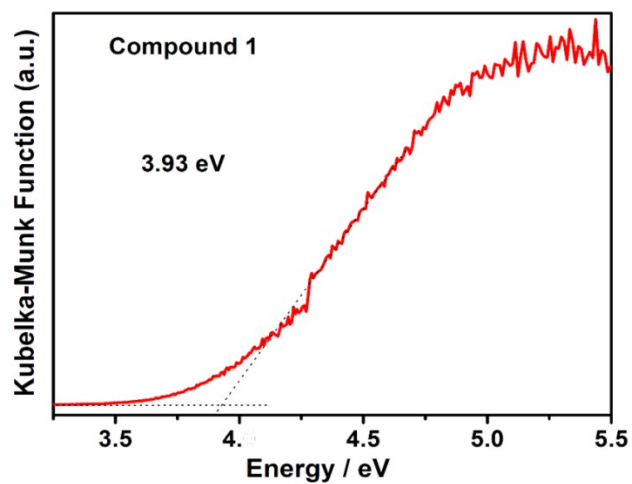

Fig. S13 UV-Vis spectrum of compound 1.

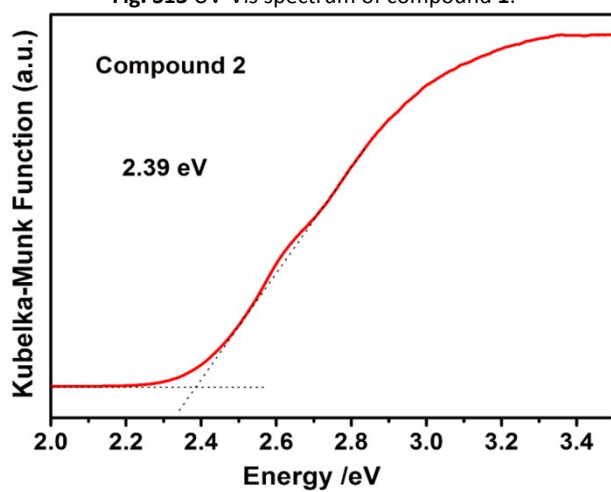

Fig. S14 UV-Vis spectrum of compound 2.

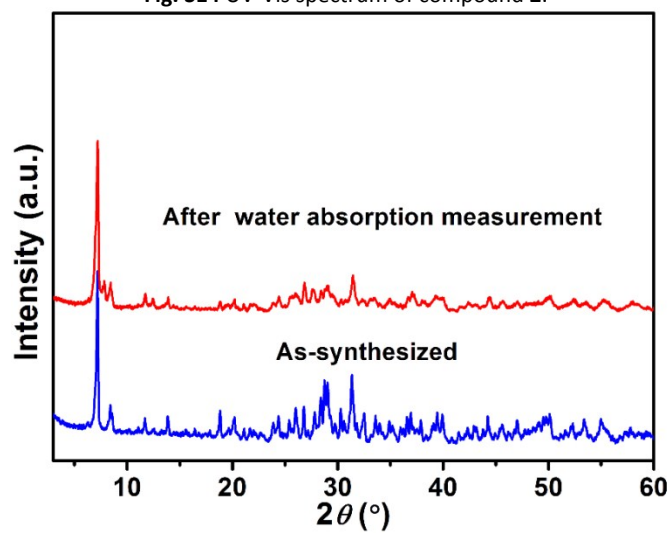

Fig. S15 PXRD patterns for samples of as-synthesize 1 and that after water absorption measurement.

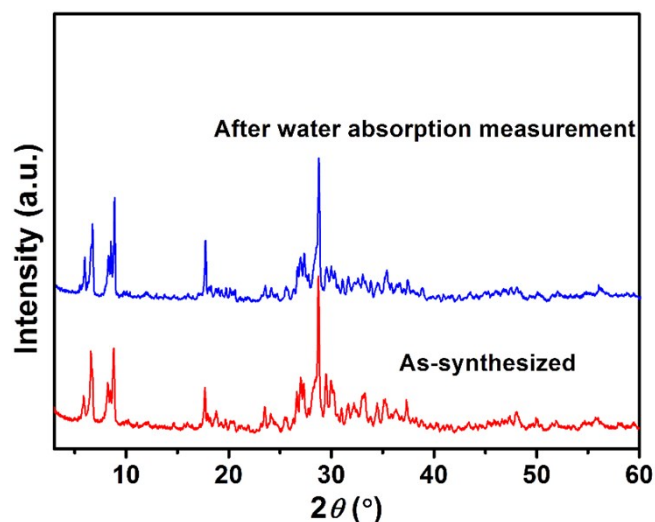

Fig. S16 PXRD patterns for samples of as-synthesize 2 and that after water absorption measurement.

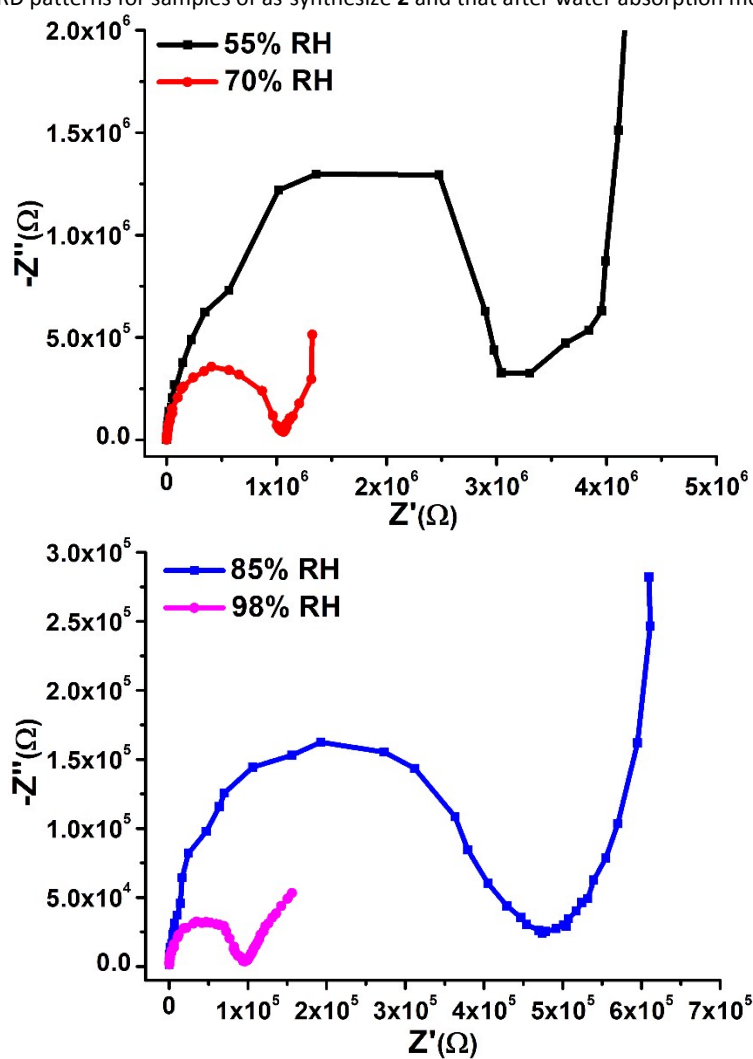

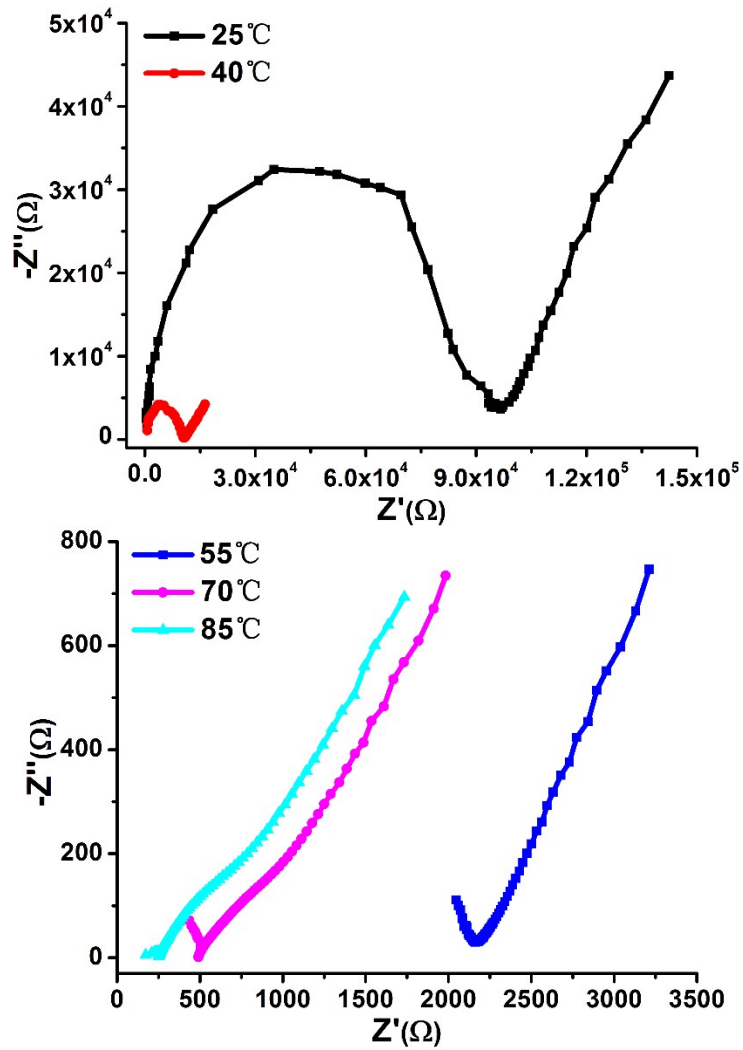

Fig. S17 Impedance spectra of complex 1 under different relative humidities at 25 °C and different temperature conditions at 98% RH.

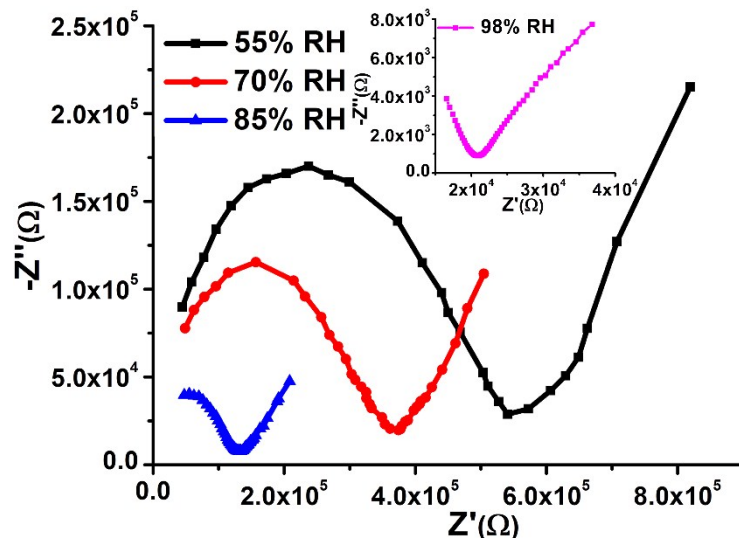



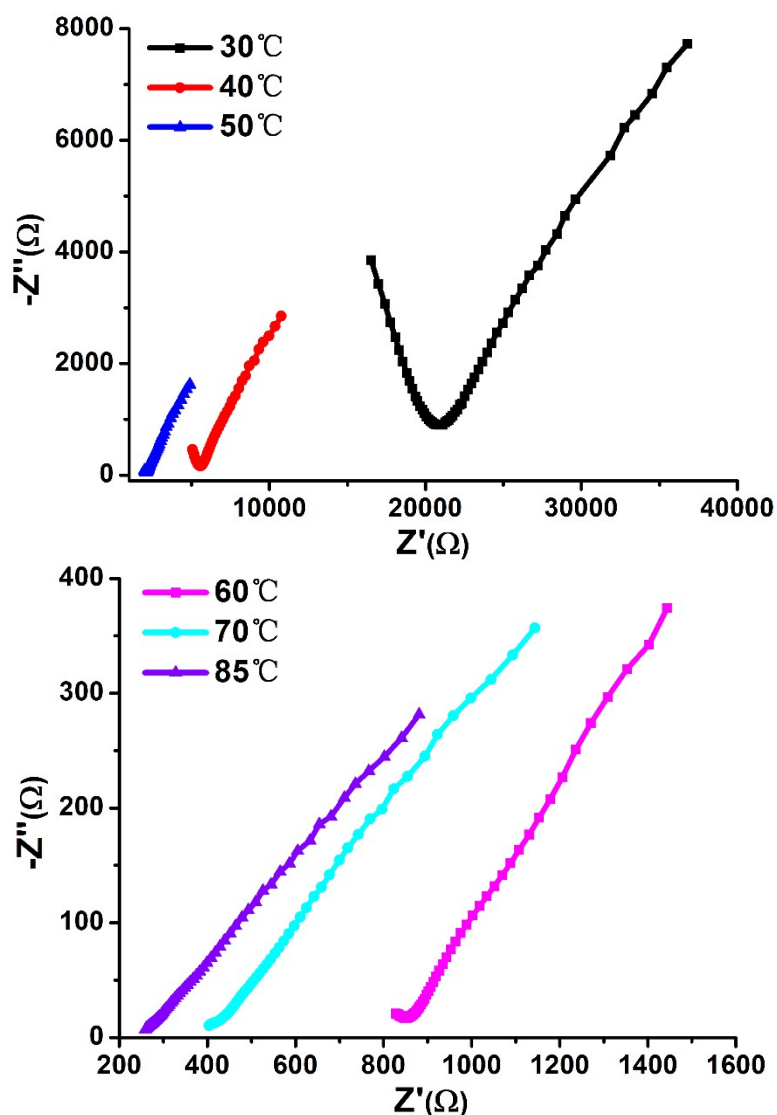

Fig. S18 Impedance spectra of complex **2** under different relative humidities at 30 °C and different temperature conditions at 98% RH.

Table S2 Proton conductivity ( $\sigma$ ) values of **1** at 25 °C and **2** at 30 °C under varied RH conditions.

| Compound <b>1</b>              |                       |                       |                       |                       |
|--------------------------------|-----------------------|-----------------------|-----------------------|-----------------------|
| RH %                           | 55                    | 70                    | 85                    | 98                    |
| $\sigma$ (S cm <sup>-1</sup> ) | $1.85 \times 10^{-7}$ | $5.74 \times 10^{-7}$ | $1.29 \times 10^{-6}$ | $6.50 \times 10^{-6}$ |
| Compound <b>2</b>              |                       |                       |                       |                       |
| RH %                           | 55                    | 70                    | 85                    | 98                    |
| $\sigma$ (S cm <sup>-1</sup> ) | $1.41 \times 10^{-6}$ | $2.04 \times 10^{-6}$ | $5.68 \times 10^{-6}$ | $3.66 \times 10^{-5}$ |

Table S3 Proton conductivity ( $\sigma$ ) values of **1** and **2** under 98% RH and at different temperatures.

| Compound <b>1</b>              |                       |                       |                       |                       |                       |                       |
|--------------------------------|-----------------------|-----------------------|-----------------------|-----------------------|-----------------------|-----------------------|
| T/°C                           | 25                    | 40                    | 55                    | 70                    | 85                    |                       |
| $\sigma$ (S cm <sup>-1</sup> ) | $6.50 \times 10^{-6}$ | $5.72 \times 10^{-5}$ | $2.83 \times 10^{-4}$ | $1.25 \times 10^{-3}$ | $2.43 \times 10^{-3}$ |                       |
| Compound <b>2</b>              |                       |                       |                       |                       |                       |                       |
| T/°C                           | 30                    | 40                    | 50                    | 60                    | 70                    | 85                    |
| $\sigma$ (S cm <sup>-1</sup> ) | $3.66 \times 10^{-5}$ | $1.37 \times 10^{-4}$ | $3.66 \times 10^{-4}$ | $8.97 \times 10^{-4}$ | $1.89 \times 10^{-3}$ | $2.95 \times 10^{-3}$ |
